# Supplementary material
Source: MDPI journal article supplement (https://www.mdpi.com/2075-163X/11/6/582)
Supplement: s1 [file s1]

Archive with 1 entries (1 files):
- minerals-1228289-supplementary.pdf
