# Supplementary material
Source: MDPI journal article supplement (https://www.mdpi.com/2075-163X/11/6/582)
Supplement: s1 [file s1 › minerals-1228289-supplementary.pdf]

# A Mineralogical Museum as a Geotourism Attraction: A Case Study

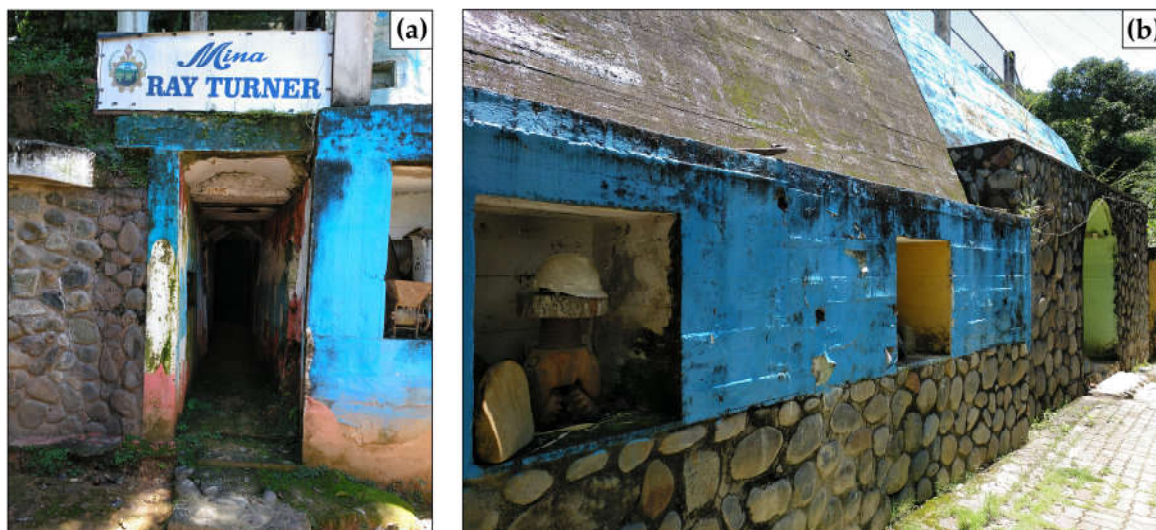

**Figure S1.** External services of the museum; (a,b) Underground mines.

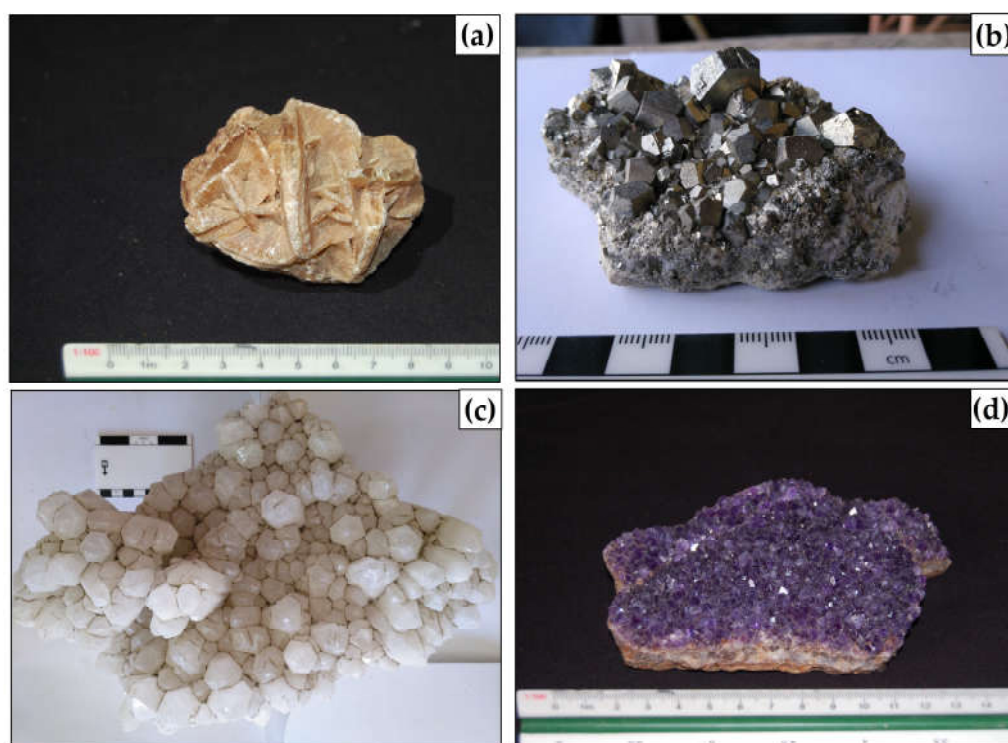

**Figure S2.** Mineralogical and petrographic collection: (a) desert rose, (b) pyrite, (c) quartz, and (d) amethyst.

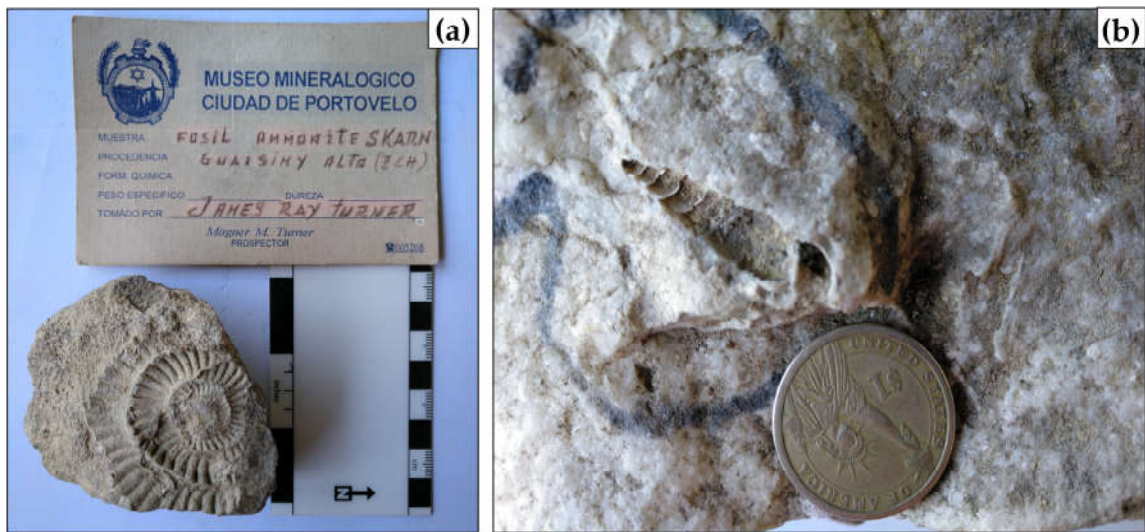

**Figure S3.** Paleontological units: (a) ammonite and (b) gastropod footprint.

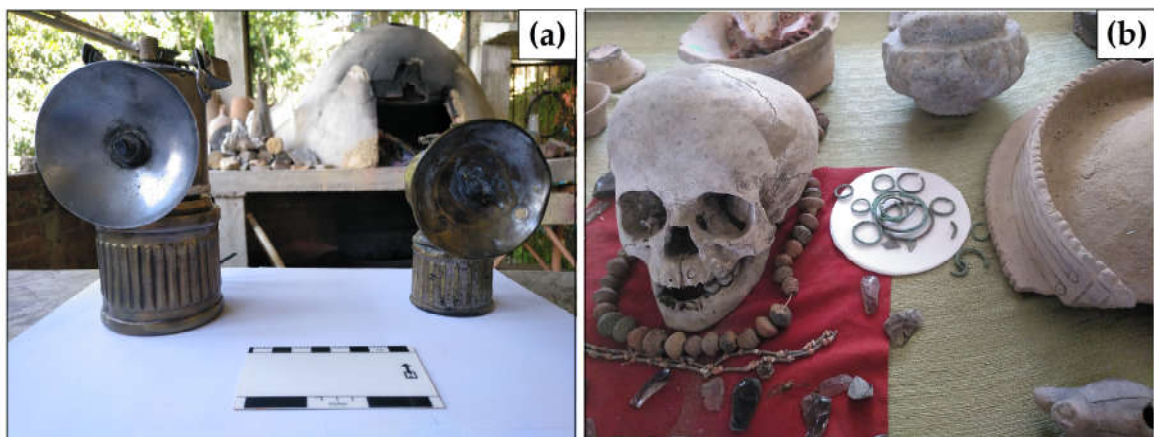

**Figure S4.** (a) Artisanal mining equipment and (b) Archaeological pieces.
